# Supplementary material for: Obesity and Roux-en-Y gastric bypass drive changes in miR-31 and miR-215 expression in the human rectal mucosa
Source: PubMed Central journal article supplement (PMC8794786; doi:10.1038/s41366-021-01005-y), 2021-10-29
Supplement: 41366_2021_1005_MOESM1_ESM.pdf [file 41366_2021_1005_MOESM1_ESM.pdf]

Supplementary figures:

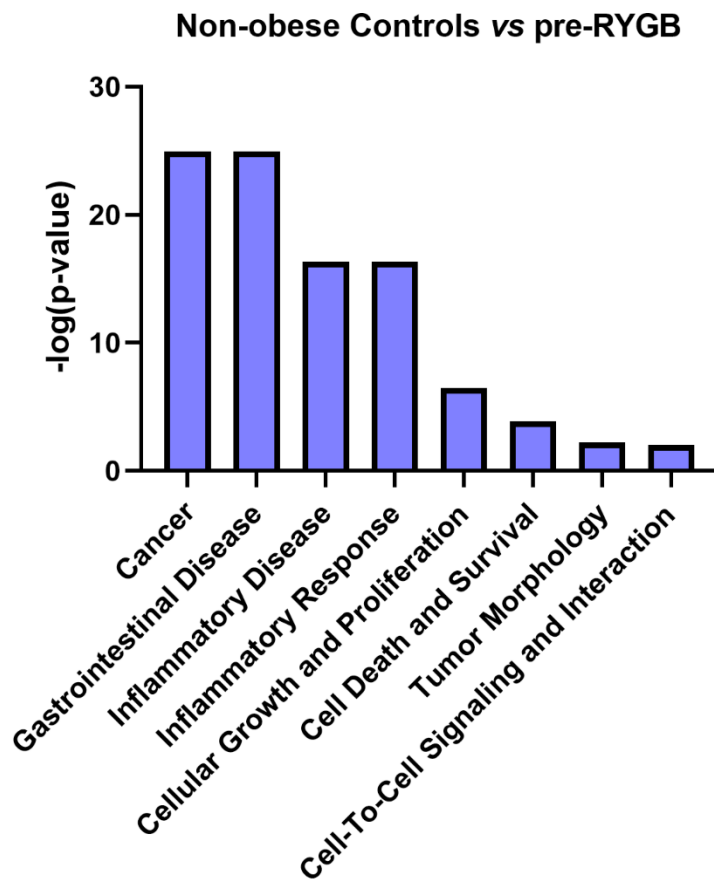

**Figure S1:** Significant IPA predicted interplay in diseases between miRNAs and molecules occurring in network number 1 (Figure 1D) when comparing non-obese Controls with obese individuals before RYGB.

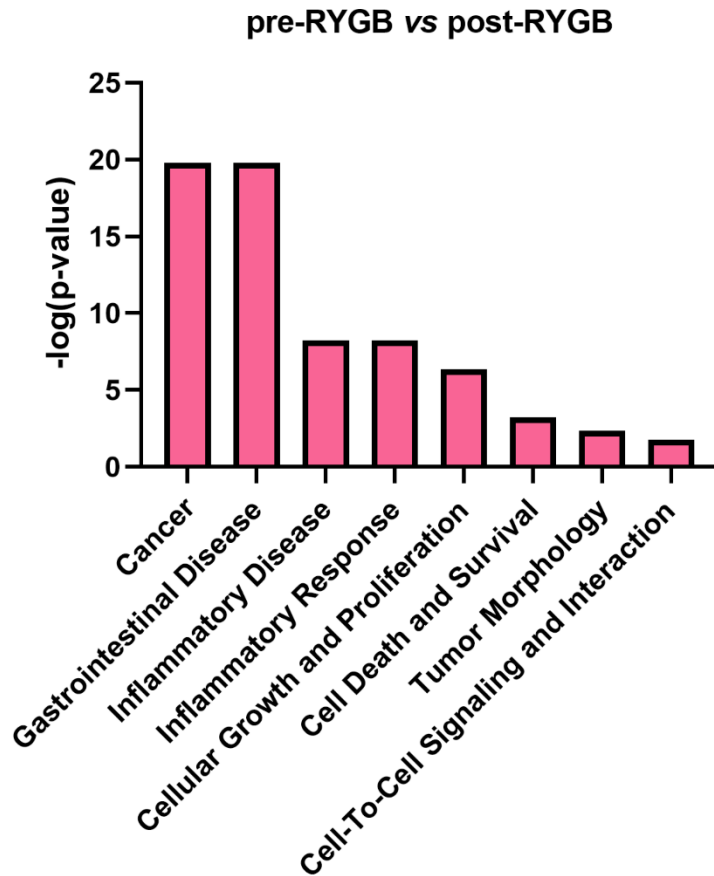

**Figure S2:** Significant IPA predicted interplay in diseases between miRNAs and molecules occurring in network number 2 (Figure 2D) when comparing obese patients pre- vs post-RYGB.

A)

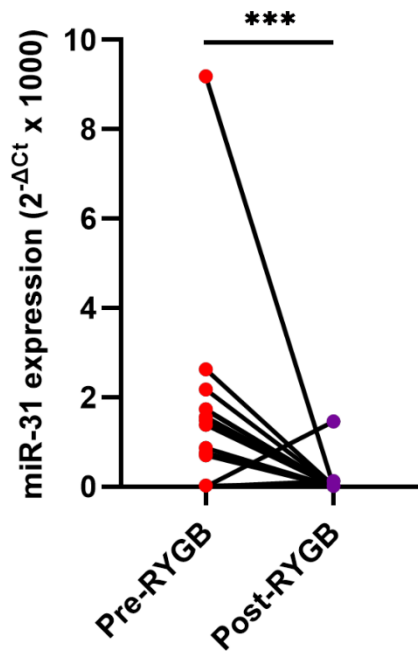

B)

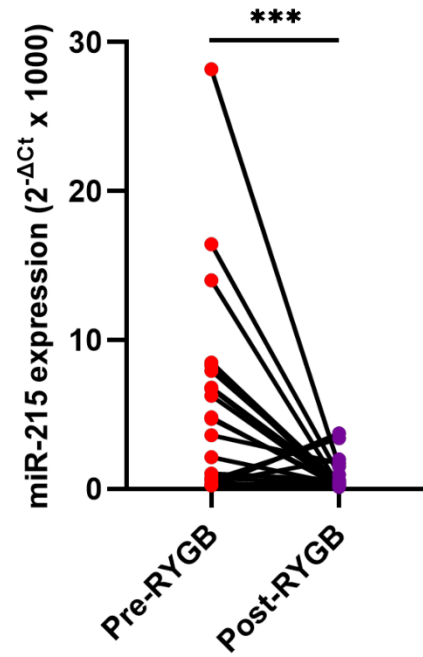

**Figure S3:** Inter-individual change in miRNA expression in the rectal mucosa of participants pre- and post-RYGB A) miR-31 B) miR-215.

**Supplementary tables:**

**Table S3: Mean raw and normalised miRNA counts for pre- and post-RYGB patients and non-obese Controls.**

|                          | <b>Pre-RYGB patients</b> | <b>Post-RYGB patients</b> | <b>Non-obese Controls</b> |
|--------------------------|--------------------------|---------------------------|---------------------------|
| <b>Raw counts</b>        | 206515.5                 | 195584.6923               | 124993.0909               |
| <b>Normalised counts</b> | 150204.25                | 149292.9989               | 158932.0198               |

**Table S7: Significant IPA predicted interplay in diseases between miRNAs and molecules occurring in network number 2 (Figure 2D) when comparing obese patients pre- vs post-RYGB.**

| Disease                                | p-value  | minus log pvalue | Molecules                                                                                                                                                                                                                                                                                                                                                                                                                                                                   |
|----------------------------------------|----------|------------------|-----------------------------------------------------------------------------------------------------------------------------------------------------------------------------------------------------------------------------------------------------------------------------------------------------------------------------------------------------------------------------------------------------------------------------------------------------------------------------|
| Cancer                                 | 1.54E-20 | -19.8125         | let-7a-3p, let-7a-5p, miR-125b-5p, miR-126a-3p, miR-126a-5p, miR-129-5p, miR-132-3p, miR-148a-3p, miR-15b-3p, miR-16-5p, miR-181a-1-3p, miR-185-5p, miR-191-5p, miR-192-5p, miR-194-5p, miR-196a-5p, miR-200a-5p, miR-200b-3p, miR-203a-3p, miR-204-5p, miR-210-3p, miR-223-3p, miR-29b-3p, miR-30a-3p, miR-30c-5p, miR-31-5p, miR-335-3p, miR-338-3p, miR-342-3p, miR-421-3p, miR-450a-5p, miR-452-5p, miR-455-3p, miR-652-3p, miR-671-5p, miR-7a-5p, miR-874-3p, miR-9-5p |
| Gastrointestinal Disease               | 1.54E-20 | -19.8125         | let-7a-5p, miR-125b-5p, miR-126a-3p, miR-126a-5p, miR-129-5p, miR-148a-3p, miR-16-5p, miR-181a-1-3p, miR-185-5p, miR-191-5p, miR-192-5p, miR-196a-5p, miR-200a-5p, miR-200b-3p, miR-203a-3p, miR-204-5p, miR-210-3p, miR-223-3p, miR-28-3p, miR-29b-3p, miR-30a-3p, miR-30c-5p, miR-31-5p, miR-421-3p, miR-450a-5p, miR-452-5p, miR-455-3p, miR-652-3p, miR-671-5p, miR-7a-5p, miR-874-3p, miR-9-5p                                                                         |
| Inflammatory Disease                   | 5.98E-09 | -8.2233          | let-7a-5p, miR-125b-5p, miR-126a-3p, miR-129-5p, miR-148a-3p, miR-16-5p, miR-181a-1-3p, miR-185-5p, miR-192-5p, miR-196a-5p, miR-200b-3p, miR-203a-3p, miR-210-3p, miR-223-3p, miR-29b-3p, miR-30a-3p, miR-30c-5p, miR-342-3p, miR-671-5p                                                                                                                                                                                                                                   |
| Inflammatory Response                  | 5.98E-09 | -8.2233          | let-7a-5p, miR-125b-5p, miR-148a-3p, miR-16-5p, miR-185-5p, miR-192-5p, miR-200b-3p, miR-210-3p, miR-223-3p, miR-30c-5p, miR-342-3p, miR-671-5p                                                                                                                                                                                                                                                                                                                             |
| Cellular Growth and Proliferation      | 4.23E-07 | -6.37366         | let-7a-5p, miR-125b-5p, miR-126a-5p, miR-129-5p, miR-132-3p, miR-148a-3p, miR-16-5p, miR-185-5p, miR-192-5p, miR-194-5p, miR-200a-5p, miR-200b-3p, miR-203a-3p, miR-204-5p, miR-223-3p, miR-29b-3p, miR-30a-3p, miR-31-5p, miR-342-3p, miR-7a-5p, miR-874-3p                                                                                                                                                                                                                |
| Cell Death and Survival                | 0.000569 | -3.24489         | let-7a-5p, miR-125b-5p, miR-129-5p, miR-148a-3p, miR-16-5p, miR-185-5p, miR-194-5p, miR-200b-3p, miR-203a-3p, miR-204-5p, miR-210-3p, miR-223-3p, miR-29b-3p, miR-455-3p, miR-7a-5p                                                                                                                                                                                                                                                                                         |
| Tumor Morphology                       | 0.00433  | -2.36351         | miR-125b-5p, miR-16-5p, miR-200b-3p                                                                                                                                                                                                                                                                                                                                                                                                                                         |
| Cell-To-Cell Signaling and Interaction | 0.0172   | -1.76447         | miR-16-5p                                                                                                                                                                                                                                                                                                                                                                                                                                                                   |

**Table S8: Overlapping molecules between the pre- vs post-RYGB network and the pre-RYBG vs non-obese Controls network from which the overlapping miRNAs were used to generate an additional network**

| Molecules    |
|--------------|
| miR-126a-3p  |
| miR-16-5p    |
| miR-196a-5p  |
| miR-203a-3p  |
| miR-204-5p   |
| miR-210-3p   |
| miR-3150b-3p |
| miR-455-3p   |
| miR-7a-5p    |
| mir-9        |
| miR-9-5p     |

**Table S10: MiRNA expression ( $2^{-\Delta Ct} \times 1,000$ ) determined by qPCR in the rectal mucosa of initially obese individuals pre- and post-RYGB and in non-obese Controls (NS: not significant; \*: p-value  $\leq 0.05$ ; \*\*: p-value  $\leq 0.01$ )**

| miRNA    | Obese pre-RYGB | Obese post-RYGB | Non-obese Controls | P-value; pre-RYGB vs Controls | P-value; pre- vs post-RYGB |
|----------|----------------|-----------------|--------------------|-------------------------------|----------------------------|
| miR-204  | 3.251229       | 2.037882        | 1.796871           | NS                            | NS                         |
| miR-671  | 1.785026       | 1.556161        | 0.535563           | NS                            | NS                         |
| miR-892  | 20.18802       | 11.68318        | 17.32017           | NS                            | NS                         |
| miR-1247 | 1.806269       | 0.388467        | 0.289823           | NS                            | NS                         |
| miR-3196 | 6.882955       | 5.672692        | 2.657616           | *                             | *                          |
| miR-4516 | 680.5764       | 683.1289        | 257.739            | **                            | NS                         |
